# Supplementary material for: Food safety culture maturity and its relation to company and employee characteristics
Source: PubMed Central journal article supplement — Heliyon. 2023 Nov 2;9(11):e21561. doi: 10.1016/j.heliyon.2023.e21561 (PMC10654140; doi:10.1016/j.heliyon.2023.e21561), 2023-11-02
Supplement: mmc1.pdf [file mmc1.pdf]

Dear participant,

Below you will find the questionnaire for the Q-DNA project, carried out by Ghent University. The Q-DNA project is about food safety culture, in which the human aspect in food safety is important. This questionnaire consists of 57 questions and will be completed by the management and all employees in your company. By completing the questionnaire you contribute to our research and the knowledge within your company. There are no right or wrong answers, so try to answer as honestly as possible. All data obtained will be processed strictly confidentially. Thank you very much for your contribution!

### Consent form

We ask you to first read this form carefully and indicate what you agree with or do not agree with the following statements.

I declare that:

- My participation is completely **voluntary** and that I know that I can **stop my participation at any given moment**;
  - I give permission to **anonymously** use the collected **results**, also for other researchers;
  - I am aware that not participating or stopping my participation **will never cause negative consequences** for me;
  - I know that I can get a **summary** of the study on request after the study has been completed and the results are all collected;
  - I agree with the **unannounced site visits** and know that information collected will always be anonymous.
- I declare that I have received sufficient information about this research and the opportunity to ask additional questions.
- I declare that I agree with this consent form.
